# Supplementary material for: FeCo/N-co-doped 3D carbon nanofibers as efficient bifunctional oxygen electrocatalyst for Zn–air batteries
Source: Royal Society of Chemistry journal article supplement (doi:10.1039/d2nr05432a), 2022-12-12
Supplement: d2nr05432a1.pdf [file d2nr05432a1.pdf]

## Supplementary Information

### FeCo/N-co-doped 3D Carbon Nanofibers as Efficient Bifunctional Oxygen Electrocatalyst for Zn-Air Batteries

Jiangbo Wang,<sup>a</sup> Yanan Zhang,<sup>a</sup> Xue Guo,<sup>a</sup> Shiqin Liao,<sup>b</sup> Pengfei Lv<sup>a</sup> and Qufu Wei<sup>\*a</sup>

<sup>a</sup> Key Laboratory of Eco-Textiles, Ministry of Education, Jiangnan University, 1800 Lihu Avenue,

Jiangsu Province, Wuxi 214122, PR China

<sup>b</sup> Jiangxi Center for Modern Apparel Engineering and Technology, Jiangxi Institute of Fashion

Technology, Nanchang 330201, China

\* Corresponding authors. Email addresses: qfwei@jiangnan.edu.cn (Q. Wei)

## Chemical reagents and Materials

Potassium ferricyanide ( $K_3[Fe(CN)_6]$ ), cobalt nitrate ( $Co(NO_3)_2 \cdot 6H_2O$ ), trisodium citrate dihydrate ( $C_6H_5Na_3O_7$ ) obtained at Sinopharm Chemical Reagent Co., Ltd., China. 20 wt% Pt/C and  $RuO_2$  acquired at Aladdin Co., Ltd., China. 5 wt% Nafion was obtained from Chuxi Co., Ltd., Shanghai, China.

## Calculations

Koutecky–Levich equation was used to determine the number of electrons transferred ( $n$ ) for ORR and to plot corresponding K-L curves at different potentials.

$$\frac{1}{j} = \frac{1}{j_k} + \frac{1}{B\omega^{1/2}} \quad (1)$$

$$B = 0.2nFC_0D_0^{2/3}\nu^{-1/6} \quad (2)$$

$J$  is measured current,  $J_k$  is kinetic current density,  $\omega$  is the rotation speed of RDE and  $B$  is the slope of K-L plots. In addition,  $n$  is the transferred electron number,  $F$  is Faraday constant (96 485 C/mol),  $C_0$  is oxygen concentration in solution ( $1.2 \times 10^{-6}$  mol/cm<sup>3</sup>),  $D_0$  is diffusion coefficient of O<sub>2</sub> in 1 M KOH ( $1.9 \times 10^{-5}$  cm<sup>2</sup>/s) and  $\nu$  is the kinetic viscosity of the electrolyte (0.01 cm<sup>2</sup>/s).

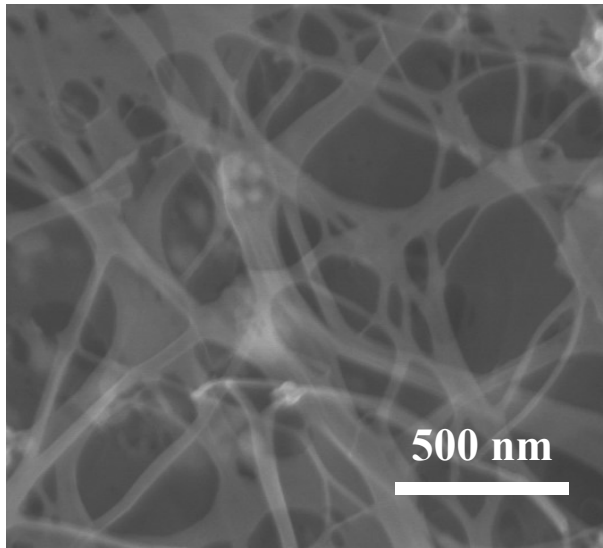

**Fig. S1** SEM pattern of BC nanofibers after carbonization

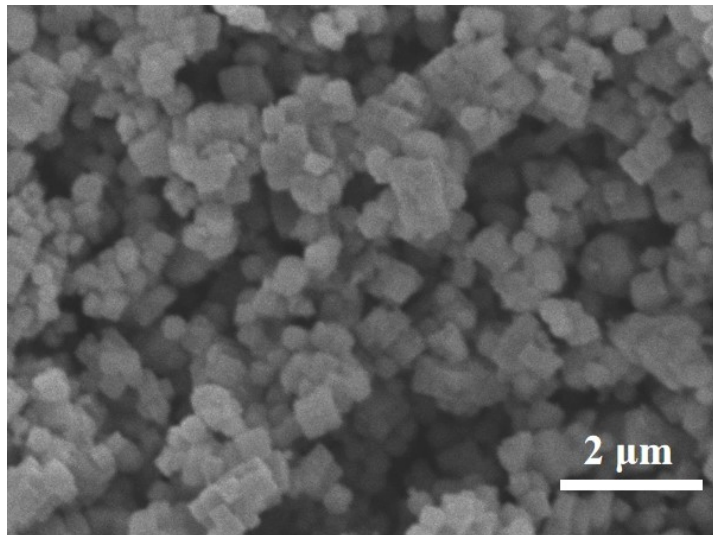

**Fig. S2** SEM pattern of PBA nanoparticles before carbonization

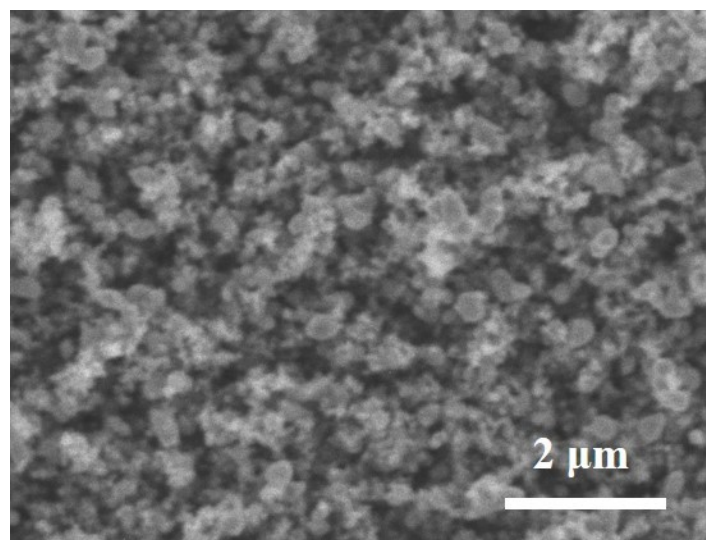

Fig. S3 SEM pattern of PBA nanoparticles after carbonization

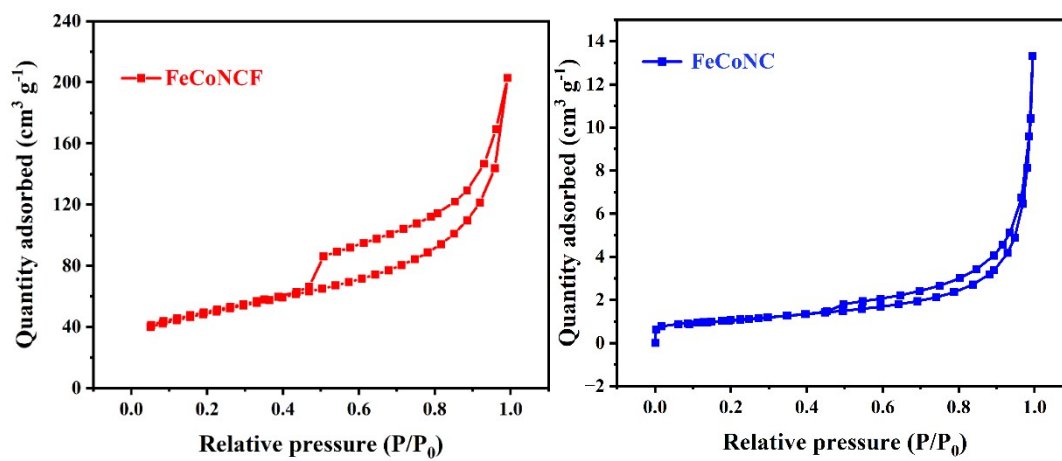

Fig. S4 N<sub>2</sub> adsorption-desorption isotherms of FeCoNCF and FeCoNC

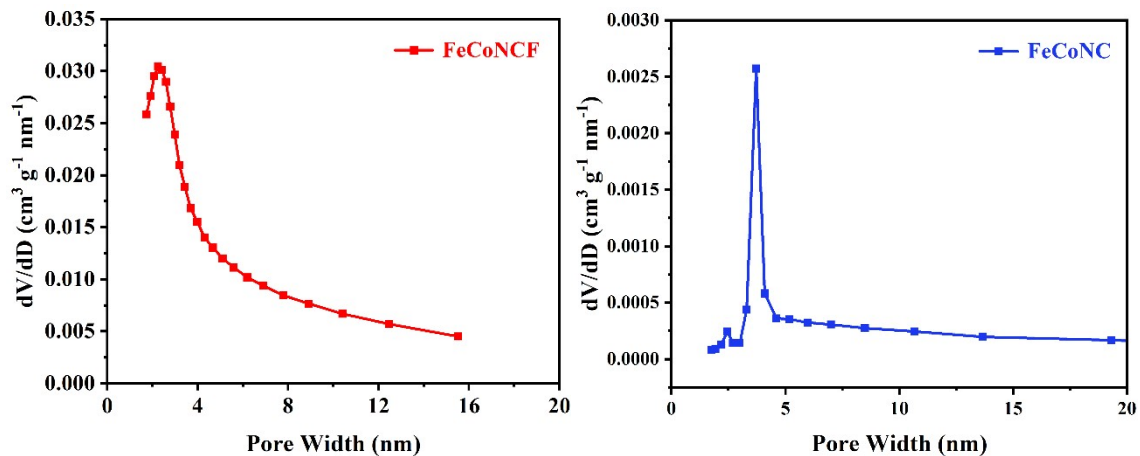

**Fig. S5** Pore diameter distributions determined by BET method of FeCoNCF and FeCoNC

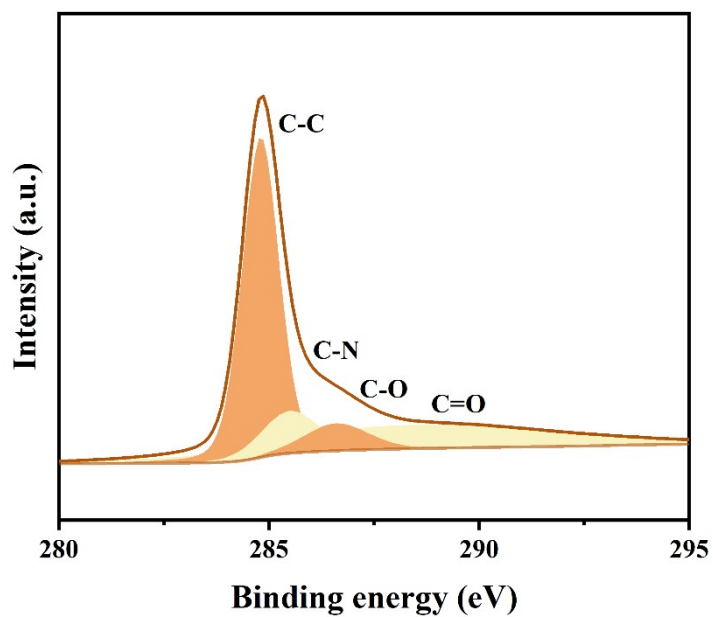

**Fig. S6** High-resolution XPS survey spectrum of C 1s of FeCoNCF sample

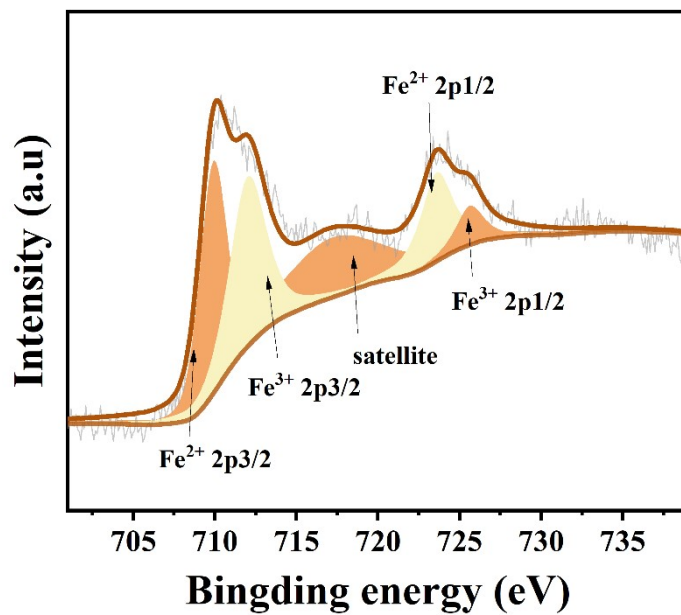

Fig. S7 High-resolution XPS survey spectra of Fe 2p of FeCoNC

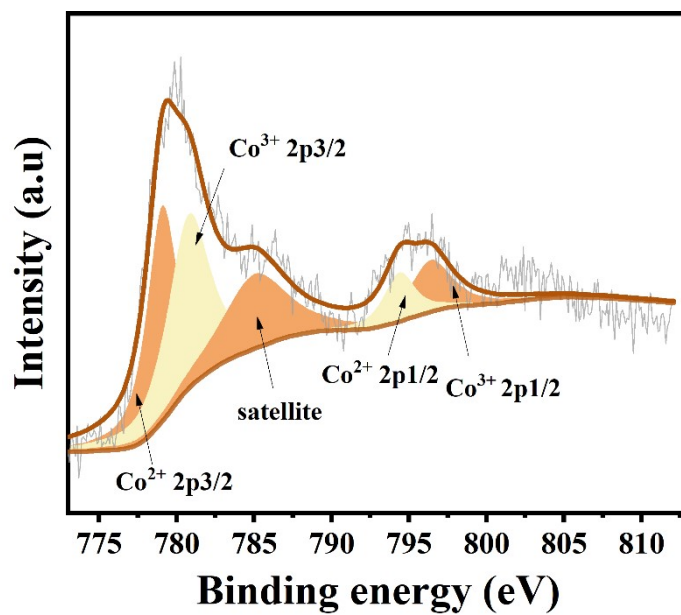

Fig. S8 High-resolution XPS survey spectra of Fe 2p of FeCoNCF and FeCoNC

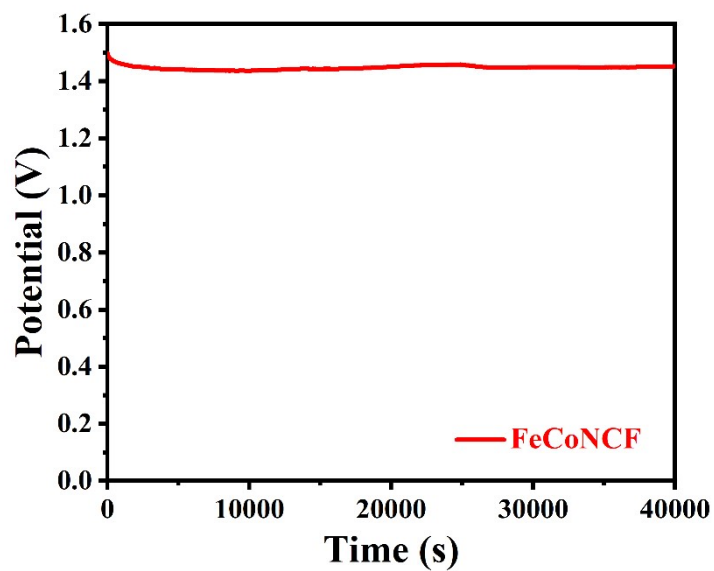

Fig. S9 Chronopotentiometry curve for FeCoNCF at 10 mA cm<sup>-2</sup>

**Table S1** Comparison of ORR and OER performance of FeCoNCF catalyst with transition metal-based electrocatalysts in reported in literatures.

| Catalysts  | ORR activity<br>( $E_{1/2}$ : Half-wave potential;<br>TS: Tafel slope) | OER activity<br>( $\eta_{10}$ : Overpotential at current<br>density of 10 mA cm <sup>-2</sup> ) | $\Delta E$<br>( $\Delta E = E_{j=10} - E_{1/2}$ ) | Ref.             |
|------------|------------------------------------------------------------------------|-------------------------------------------------------------------------------------------------|---------------------------------------------------|------------------|
| FeCoNCF    | $E_{1/2}$ : 0.81 V<br>TS: 51 mV dec <sup>-1</sup>                      | $\eta_{10}$ : 341 mV<br>TS: 69 mV dec <sup>-1</sup>                                             | 0.761                                             | <b>This work</b> |
| NiFe/N-CNT | $E_{1/2}$ : 0.75 V<br>TS: /                                            | $\eta_{10}$ : 290 mV<br>TS: 49 mV dec <sup>-1</sup>                                             | 0.77                                              | 1                |

|                                          |                                                             |                                                           |       |    |
|------------------------------------------|-------------------------------------------------------------|-----------------------------------------------------------|-------|----|
| FeP/Fe <sub>2</sub> O <sub>3</sub> @NPCA | E <sub>1/2</sub> : 0.81 V<br>TS: 88 mV dec <sup>-1</sup>    | η <sub>10</sub> : 402 V<br>TS: 86 mV dec <sup>-1</sup>    | 0.822 | 2  |
| MnO/Co/PGC                               | E <sub>1/2</sub> : 0.78 V<br>TS: 69 mV dec <sup>-1</sup>    | η <sub>10</sub> : 307 mV<br>TS: 77 mV dec <sup>-1</sup>   | 0.757 | 3  |
| Co@N-CNT/rGO-0.1                         | E <sub>1/2</sub> : 0.82 V<br>TS: 77 mV dec <sup>-1</sup>    | η <sub>10</sub> : 480 mV<br>TS: 251 mV dec <sup>-1</sup>  | 0.89  | 4  |
| FeCo-NSCNF@NCNT                          | E <sub>1/2</sub> : 0.79 V<br>TS: 64.5 mV dec <sup>-1</sup>  | η <sub>10</sub> : 360 mV<br>TS: 49.5 mV dec <sup>-1</sup> | 0.8   | 5  |
| FeCo@NCNF                                | E <sub>1/2</sub> : 0.825 V<br>TS: 58 mV dec <sup>-1</sup>   | η <sub>10</sub> : 344 mV<br>TS: 56.6 mV dec <sup>-1</sup> | 0.749 | 6  |
| FeCo-1/NSC                               | E <sub>1/2</sub> : 0.82 V<br>TS: 69.75 mV dec <sup>-1</sup> | η <sub>10</sub> : 325 mV<br>TS: 56.6 mV dec <sup>-1</sup> | 0.735 | 7  |
| FeCo/N-DNC                               | E <sub>1/2</sub> : 0.81 V<br>TS: /                          | η <sub>10</sub> : 390 mV<br>TS: 68 mV dec <sup>-1</sup>   | 0.81  | 8  |
| FeS <sub>2</sub> -CoS <sub>2</sub> /NCFs | E <sub>1/2</sub> : 0.81 V<br>TS: 55 mV dec <sup>-1</sup>    | η <sub>10</sub> : 340 mV<br>TS: 49 mV dec <sup>-1</sup>   | 0.76  | 9  |
| Co/CNWs/CNFs                             | E <sub>1/2</sub> : 0.82 V<br>TS: 107 mV dec <sup>-1</sup>   | η <sub>10</sub> : 412 mV<br>TS: 141 mV dec <sup>-1</sup>  | 0.822 | 10 |
| FeCo@NC-750                              | E <sub>1/2</sub> : 0.80 V<br>TS: 54.6 mV dec <sup>-1</sup>  | η <sub>10</sub> : 290 mV<br>TS: 52 mV dec <sup>-1</sup>   | 0.72  | 11 |



**Table S2** Comparison of Zn-air performance of FeCoNCF catalyst with transition metal-based electrocatalysts in reported in literatures.

| Catalysts                                | OCV (V)<br>(OCV: Open-circuit voltage;<br>L=liquid ZAB; S=Solid ZAB) | Power density (mW cm <sup>-2</sup> )<br>(A= Aqueous ZAB; S=Solid-state ZAB)                                                                                                                             | Ref.             |
|------------------------------------------|----------------------------------------------------------------------|---------------------------------------------------------------------------------------------------------------------------------------------------------------------------------------------------------|------------------|
| FeCoNCF                                  | 1.46 V (S)                                                           | FeCoNCF: 49.29 mW cm <sup>-2</sup> (S)<br>Pt/C+RuO <sub>2</sub> : 30.91 mW cm <sup>-2</sup> (S)                                                                                                         | <b>This work</b> |
| NiFe/N-CNT                               | 1.48 V (A)<br>1.41 V (S)                                             | NiFe/N-CNT: 300.7 mW cm <sup>-2</sup> (A)<br>Pt/C+RuO <sub>2</sub> : 105.6 mW cm <sup>-2</sup> (A)<br>NiFe/N-CNT: 105.4 mW cm <sup>-2</sup> (S)                                                         | 1                |
| FeP/Fe <sub>2</sub> O <sub>3</sub> @NPCA | 1.42 V (S)                                                           | FeP/Fe <sub>2</sub> O <sub>3</sub> @NPCA: 130 mW cm <sup>-2</sup> (A)<br>Pt/C+RuO <sub>2</sub> : 108 mW cm <sup>-2</sup> (A)<br>FeP/Fe <sub>2</sub> O <sub>3</sub> @NPCA: 40.8 mW cm <sup>-2</sup> (S)  | 2                |
| MnO/Co/PGC                               | 1.52 V (A)                                                           | MnO/Co/PGC: 172 mW cm <sup>-2</sup> (A)<br>Pt/C+RuO <sub>2</sub> : 150 mW cm <sup>-2</sup> (A)                                                                                                          | 3                |
| Co@N-CNT/rGO-0.1                         | 1.43 V (A)                                                           | <a href="#">Co@N-CNT/rGO-0.1</a> : 122 mW cm <sup>-2</sup> (A)<br>Pt/C+RuO <sub>2</sub> : 102 mW cm <sup>-2</sup> (A)                                                                                   | 4                |
| FeCo-NSCNF@NCNT                          | /                                                                    | /                                                                                                                                                                                                       | 5                |
| FeCo@NCNF                                | 1.46 V (A)                                                           | FeCo@NCNF: 134.83 mW cm <sup>-2</sup> (A)<br>Pt/C+RuO <sub>2</sub> : 91.24 mW cm <sup>-2</sup> (A)                                                                                                      | 6                |
| FeCo-1/NSC                               | 1.45 V (A)                                                           | FeCo-1/NSC: 162.74 mW cm <sup>-2</sup> (A)<br>Pt/C+RuO <sub>2</sub> : 96.05 mW cm <sup>-2</sup> (A)<br>FeCo-1/NSC: 68.3 mW cm <sup>-2</sup> (S)<br>Pt/C+RuO <sub>2</sub> : 28.2 mW cm <sup>-2</sup> (S) | 7                |

|                                          |                          |                                                                                                                                                                                                      |    |
|------------------------------------------|--------------------------|------------------------------------------------------------------------------------------------------------------------------------------------------------------------------------------------------|----|
| FeCo/N-DNC                               | /                        | FeCo/N-DNC: 115 mW cm <sup>-2</sup> (A)<br>Pt/C+RuO <sub>2</sub> : 109 mW cm <sup>-2</sup> (A)                                                                                                       | 8  |
| FeS <sub>2</sub> -CoS <sub>2</sub> /NCFs | 1.46 V (L)<br>1.39 V (S) | FeS <sub>2</sub> -CoS <sub>2</sub> /NCFs: 257 mW cm <sup>-2</sup> (L)<br>Pt/C+RuO <sub>2</sub> : 163 mW cm <sup>-2</sup> (L)<br>FeS <sub>2</sub> -CoS <sub>2</sub> /NCFs: 69 mW cm <sup>-2</sup> (S) | 9  |
| Co/CNWs/CNFs                             | 1.46 V (L)<br>1.55 V (S) | Co/CNWs/CNFs: 304 mW cm <sup>-2</sup> (L)<br>Pt/C+RuO <sub>2</sub> : 106 mW cm <sup>-2</sup> (L)<br>Co/CNWs/CNFs: 176 mW cm <sup>-2</sup> (S)                                                        | 10 |
| FeCo@NC-750                              | 1.38 V (L)               | FeCo@NC-750: 132 mW cm <sup>-2</sup> (L)<br>Pt/C+RuO <sub>2</sub> : 136 mW cm <sup>-2</sup> (L)                                                                                                      | 11 |

## References

1. H. Lei, Z. Wang, F. Yang, X. Huang, J. Liu, Y. Liang, J. Xie, M. S. Javed, X. Lu, S. Tan and W. Mai, *Nano Energy*, 2020, **68**, 104293.
2. K. Wu, L. Zhang, Y. Yuan, L. Zhong, Z. Chen, X. Chi, H. Lu, Z. Chen, R. Zou, T. Li, C. Jiang, Y. Chen, X. Peng and J. Lu, *Adv.Mater.*, 2020, **32**, 2002292.
3. X. F. Lu, Y. Chen, S. Wang, S. Gao and X. W. Lou, *Adv.Mater.*, 2019, **31**, 1902339.
4. X. Peng, L. Wei, Y. Liu, T. Cen, Z. Ye, Z. Zhu, Z. Ni and D. Yuan, *Energy Fuels*, 2020, **34**, 8931– 8938.
5. K. Fu, Y. Wang, L. Mao, X. Yang, W. Peng, J. Jin, S. Yang and G. Li, *J Power Sourc*, 2019, **421**, 68-75.
6. H. Yu, D. Zhang, H. Hou, Y. Ma, Z. Fang, X. Lu, S. Xu, P. Hou, G. Shao, W. Yang and J. Teng, *Appl Surf Sci*, 2022, **571**, 151292.
7. S. Chang, H. Zhang and Z. Zhang, *J. Energy Chem.*, 2021, **56**, 64-71.
8. G. Fu, Y. Liu, Y. Chen, Y. Tang, J. B. Goodenough and J.-M. Lee, *Nanoscale*, 2018, **10**, 19937-19944.
9. X. Shi, B. He, L. Zhao, Y. Gong, R. Wang and H. Wang, *J Power Sourc*. 2021, **482**, 228955.
10. C. Xia, L. Huang, D. Yan, A. I. Douka, W. Guo, K. Qi and B. Y. Xia, *Adv. Funct. Mater.*, 2021, **31**, 2105021.
11. P. Cai, S. Ci, E. Zhang, P. Shao, C. Cao and Z. Wen, *Electrochim Acta*, 2016, **220**, 354-362.
